# Supplementary material for: Synthesis, characterization and biological evaluation of formononetin derivatives as novel EGFR inhibitors via inhibiting growth, migration and inducing apoptosis in breast cancer cell line
Source: Royal Society of Chemistry journal article supplement (doi:10.1039/c7ra09825a), 2017-01-01
Supplement: c7ra09825a1.pdf [file c7ra09825a1.pdf]

## Supporting Information

### Synthesis, characterization and biological evaluation of formononetin derivatives as novel EGFR inhibitors via inhibiting growth, migration and inducing apoptosis in breast cancer cell line

Hong-Yan Lin <sup>a,b,1</sup>, Wen-Xue Sun <sup>a,b,1</sup>, Chao-Sai Zheng <sup>a,b</sup>, Hong-Wei Han <sup>a,b</sup>, Xue Wang <sup>a,b</sup>, Ya-Han Zhang <sup>a,b</sup>, Han-Yue Qiu <sup>a,b</sup>, Cheng-Yi Tang <sup>a,b</sup>, Jin-Liang Qi <sup>a,b</sup>, Gui-Hua Lu <sup>a,b</sup>, Rong-Wu Yang <sup>a,b,\*</sup>, Xiao-Ming Wang <sup>a,b,\*</sup> and Yong-Hua Yang <sup>a,b,\*</sup>.

**Table S1** The binding energy of the target compounds, formononetin and lapatinib

| Compound  | CDOCKER_INTERACTION<br>_ENERGY (kcal/mol) | Compound     | CDOCKER_INTERACTION<br>_ENERGY (kcal/mol) |
|-----------|-------------------------------------------|--------------|-------------------------------------------|
| <b>4a</b> | -41.0285                                  | <b>4m</b>    | -49.2016                                  |
| <b>4b</b> | -39.2586                                  | <b>4n</b>    | -48.3509                                  |
| <b>4c</b> | -34.6878                                  | <b>4o</b>    | -41.8921                                  |
| <b>4d</b> | -40.3325                                  | <b>4p</b>    | -54.0388                                  |
| <b>4e</b> | -38.0547                                  | <b>4q</b>    | -45.3512                                  |
| <b>4f</b> | -40.0058                                  | <b>4r</b>    | -44.9801                                  |
| <b>4g</b> | -41.0508                                  | <b>4s</b>    | -51.0268                                  |
| <b>4h</b> | -56.3879                                  | <b>4t</b>    | -52.3607                                  |
| <b>4i</b> | -41.2687                                  | <b>4u</b>    | -48.0109                                  |
| <b>4j</b> | -41.0207                                  | <b>4v</b>    | <b>-64.5264</b>                           |
| <b>4k</b> | -40.8912                                  | Formononetin | -34.5681                                  |
| <b>4l</b> | -42.3901                                  | Lapatinib    | -71.0407                                  |

### Determination of 1-octanol/water partition coefficients for 4a-4v

1-Octanol/water partition coefficients was measured by a shake-flask method [1]. Both the solvents were mutually saturated before performing the experiments. Solutions of about 300  $\mu\text{g/mL}$  formononetin derivatives (**4a-4v**) were prepared in aqueous buffer solutions (pH=7.4). Then 10 mL of 1-octanol was added to 10 mL of the aqueous formononetin derivative solution in glass flasks. The mixtures were then stirred in a mechanical shaker for 1 hour. Samples were left in water baths and kept at 25  $^{\circ}\text{C}$  for at least 72 hours. After that, the aqueous phases were isolated and the concentrations were determined by measuring the UV absorbance. The partition coefficients were calculated by mass balance. All the partitioning experiments were performed in at least three times.

1-Octanol/water partition coefficient is defined as  $P=C_0/C_w$ , where  $C_0$  is the concentration of compound in 1-octanol phase at equilibrium,  $C_w$  is the concentration of compound in aqueous phase at equilibrium.

[1] Wang F. A., Molecular thermodynamics and chromatographic retention, China Meteorology Press, Beijing, 2001.

**Table S2** Measurement values for 1-octanol/water partition coefficients ( $\log P$ ) for **4a-4v**.

| compound  | $\log P$ | compound  | $\log P$ | compound  | $\log P$ |
|-----------|----------|-----------|----------|-----------|----------|
| <b>4a</b> | 2.35     | <b>4i</b> | 2.40     | <b>4q</b> | 2.42     |
| <b>4b</b> | 2.38     | <b>4j</b> | 2.48     | <b>4r</b> | 2.46     |
| <b>4c</b> | 2.39     | <b>4k</b> | 2.45     | <b>4s</b> | 2.48     |
| <b>4d</b> | 2.45     | <b>4l</b> | 2.42     | <b>4t</b> | 2.45     |
| <b>4e</b> | 2.43     | <b>4m</b> | 2.44     | <b>4u</b> | 2.49     |
| <b>4f</b> | 2.35     | <b>4n</b> | 2.39     | <b>4v</b> | 2.51     |
| <b>4g</b> | 2.38     | <b>4o</b> | 2.46     |           |          |
| <b>4h</b> | 2.46     | <b>4p</b> | 2.41     |           |          |

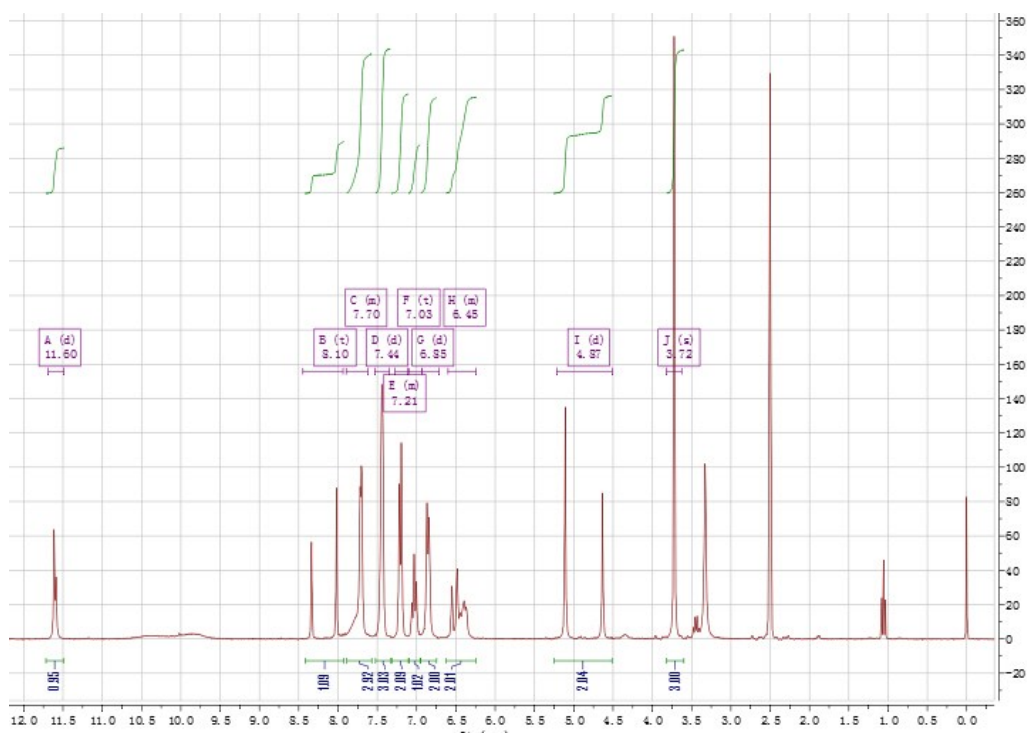

<sup>1</sup>H NMR spectrum of 4a

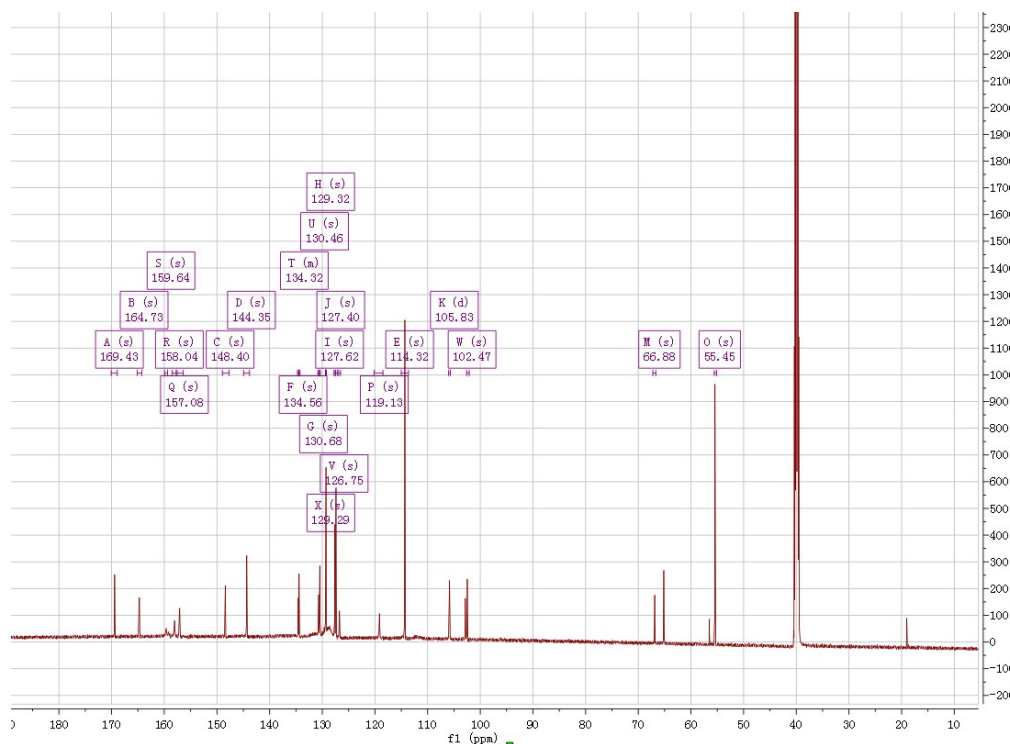

<sup>13</sup>C NMR spectrum of 4a

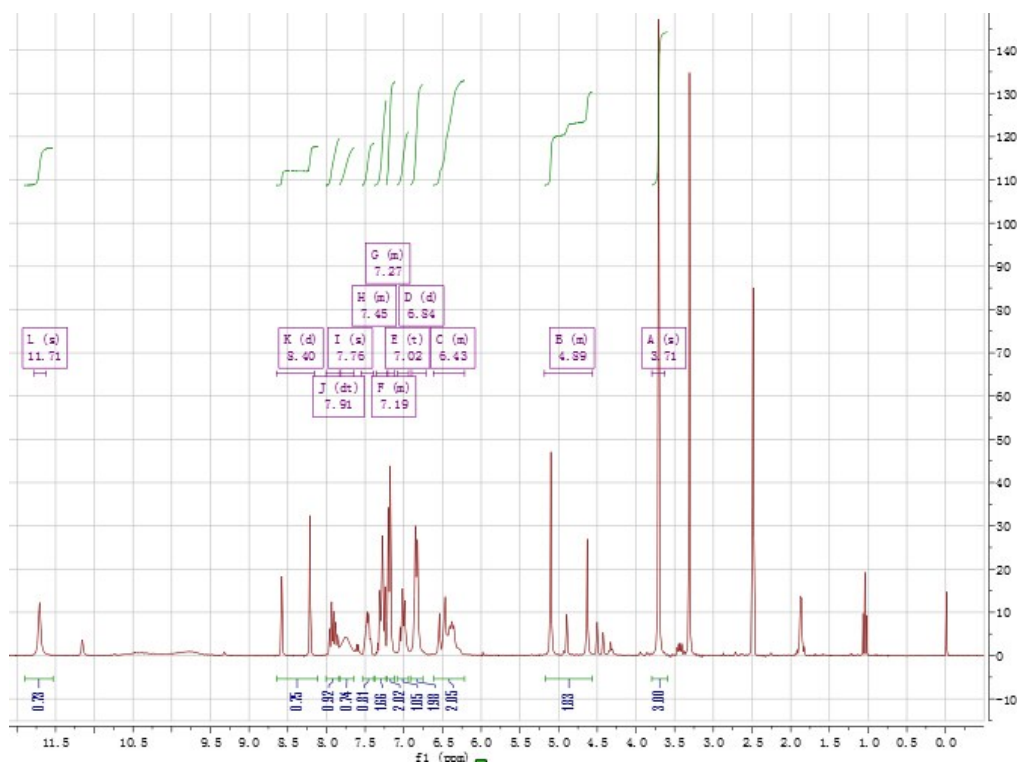

<sup>1</sup>H NMR spectrum of 4b

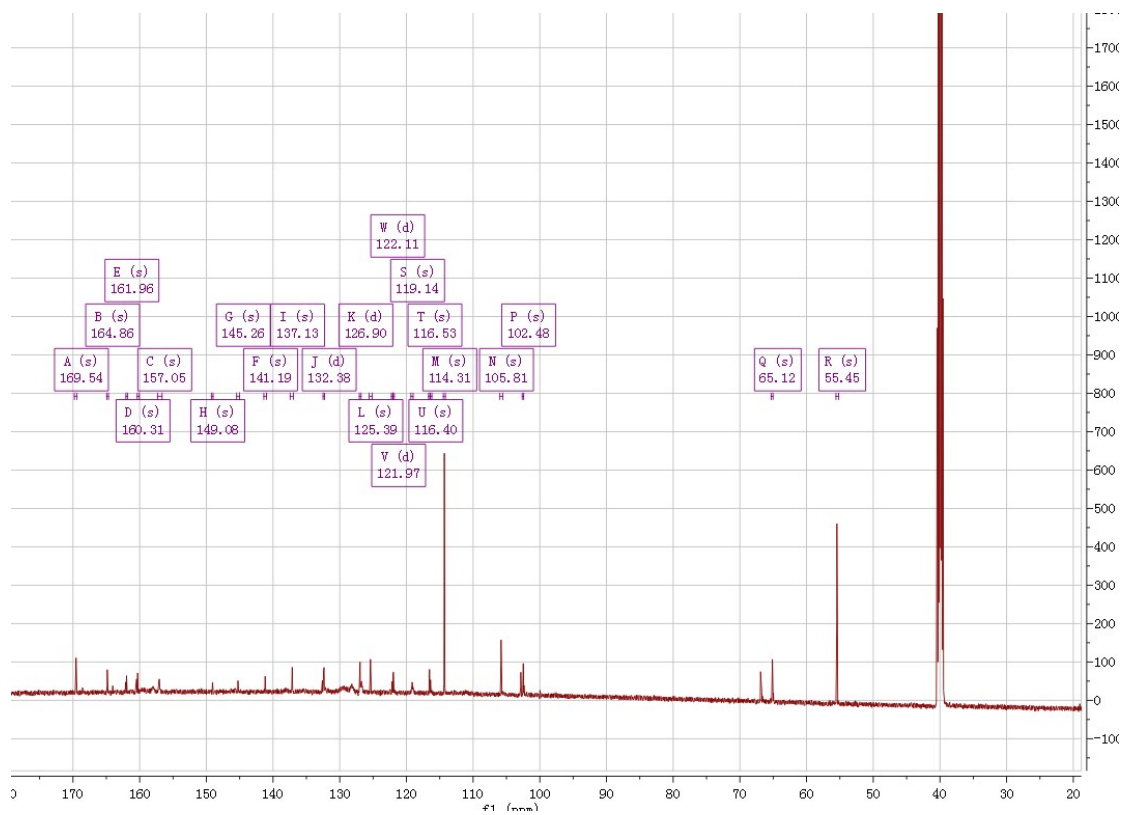

<sup>13</sup>C NMR spectrum of 4b

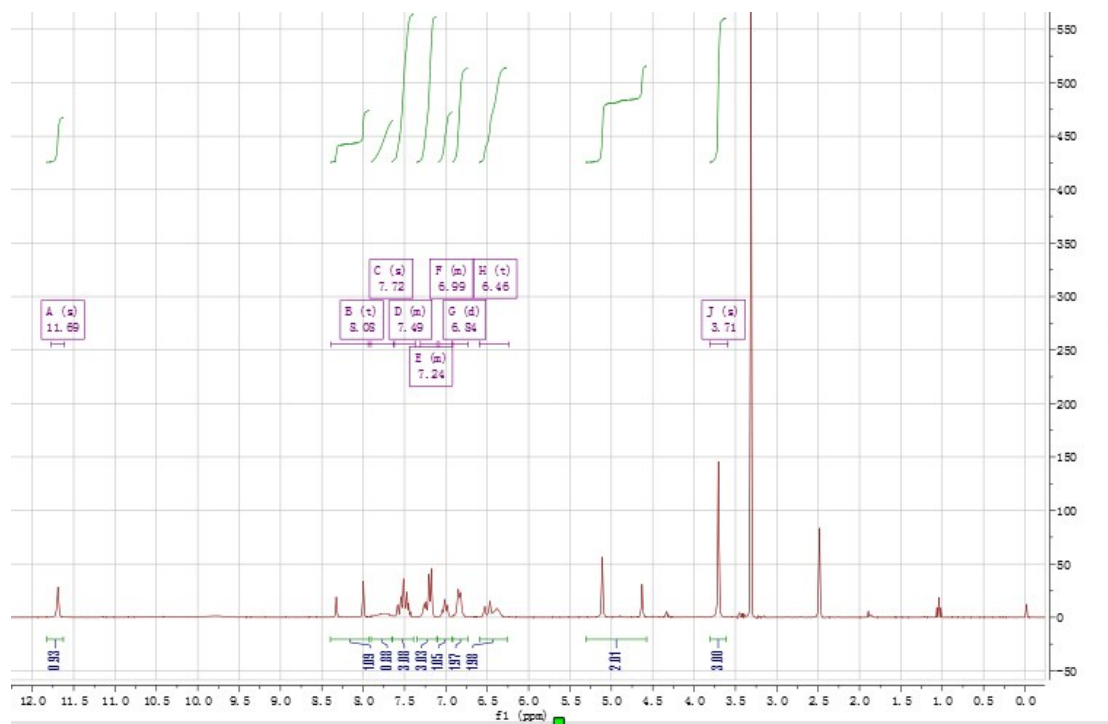

<sup>1</sup>H NMR spectrum of **4c**

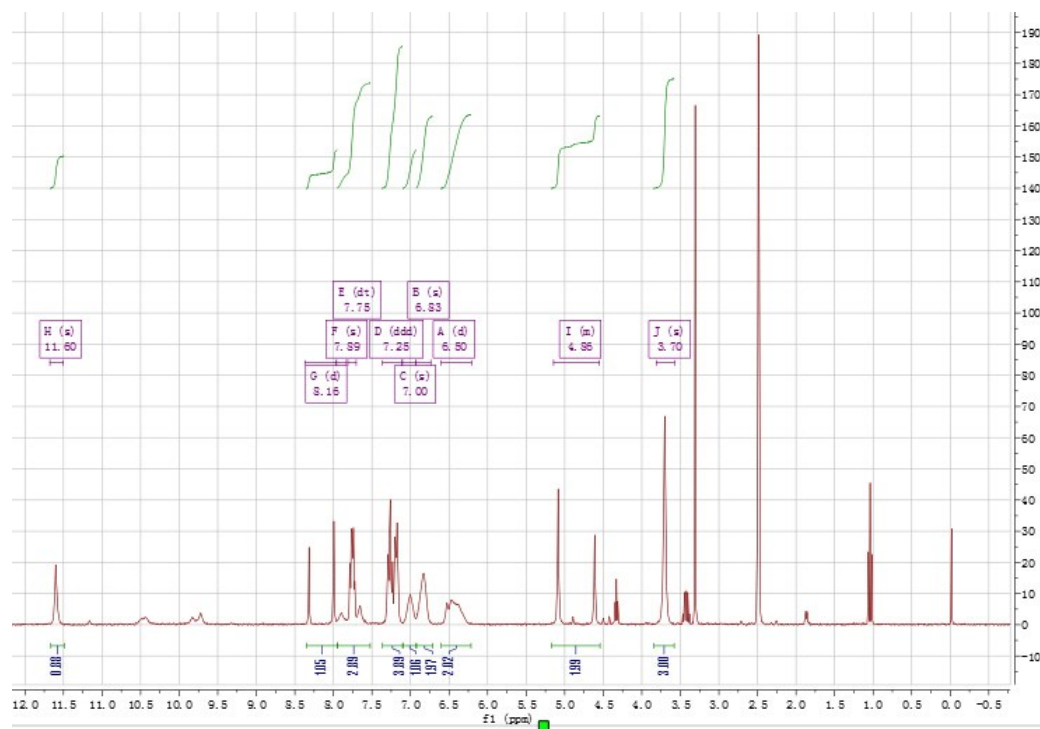

<sup>1</sup>H NMR spectrum of **4d**

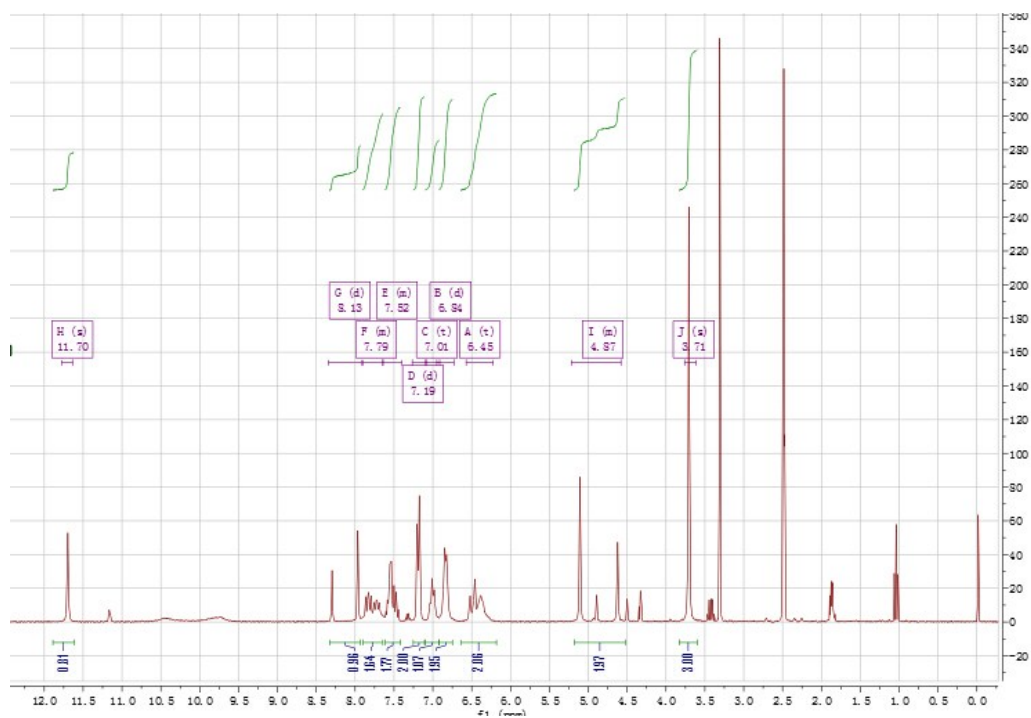

<sup>1</sup>H NMR spectrum of 4e

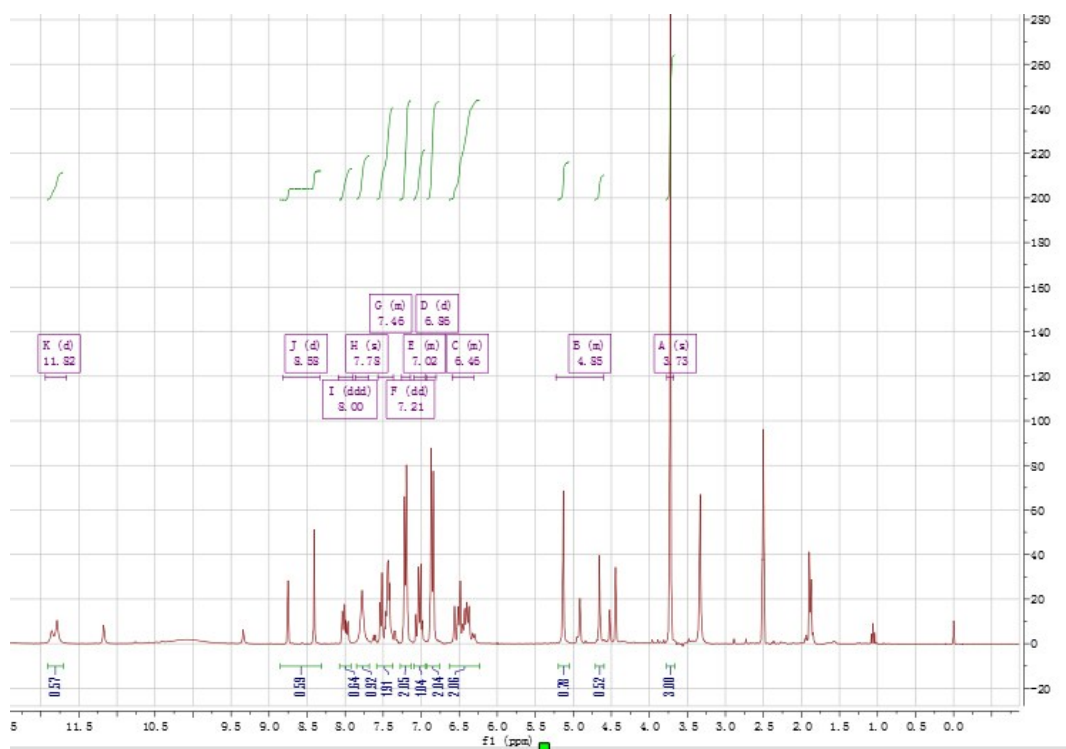

<sup>1</sup>H NMR spectrum of 4f

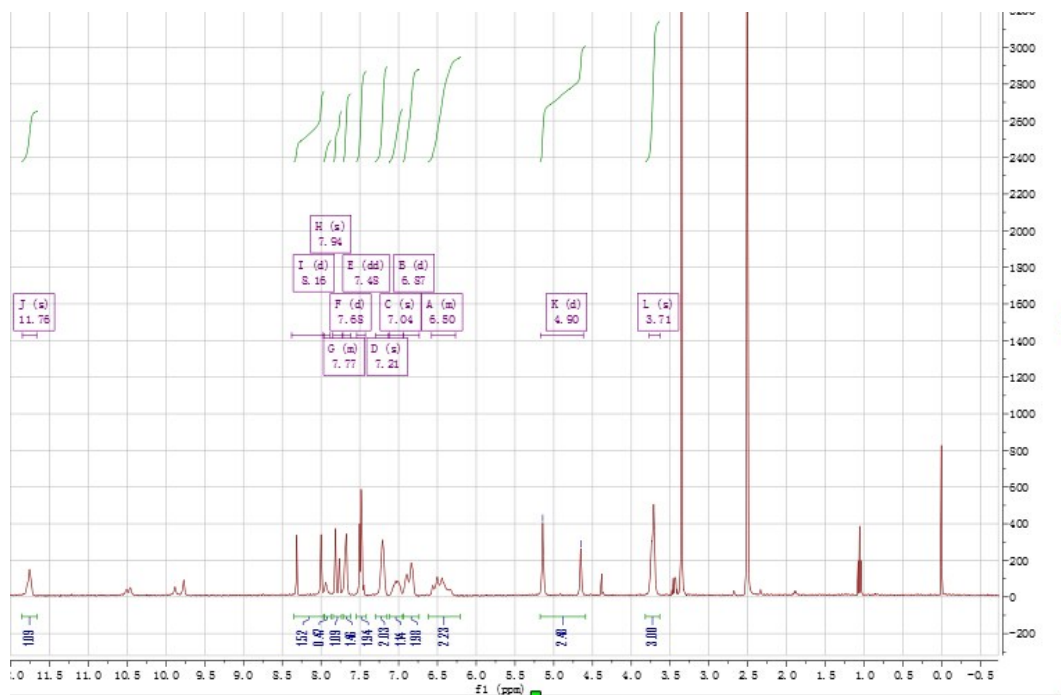

**<sup>1</sup>H NMR spectrum of 4g**

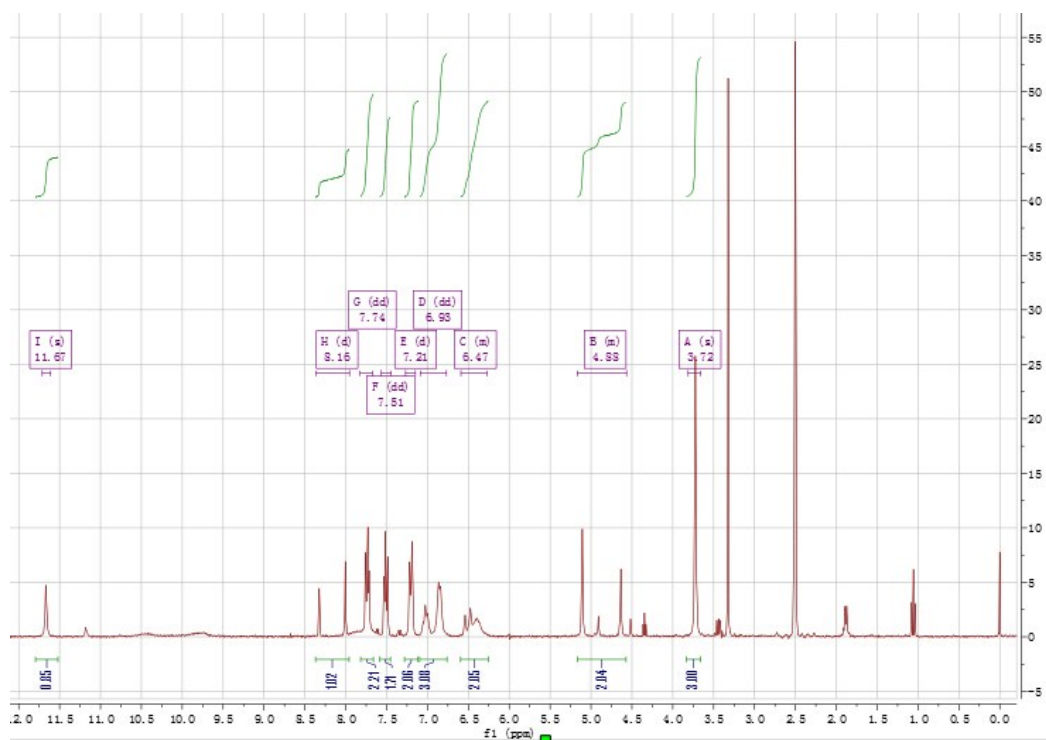

**<sup>1</sup>H NMR spectrum of 4h**

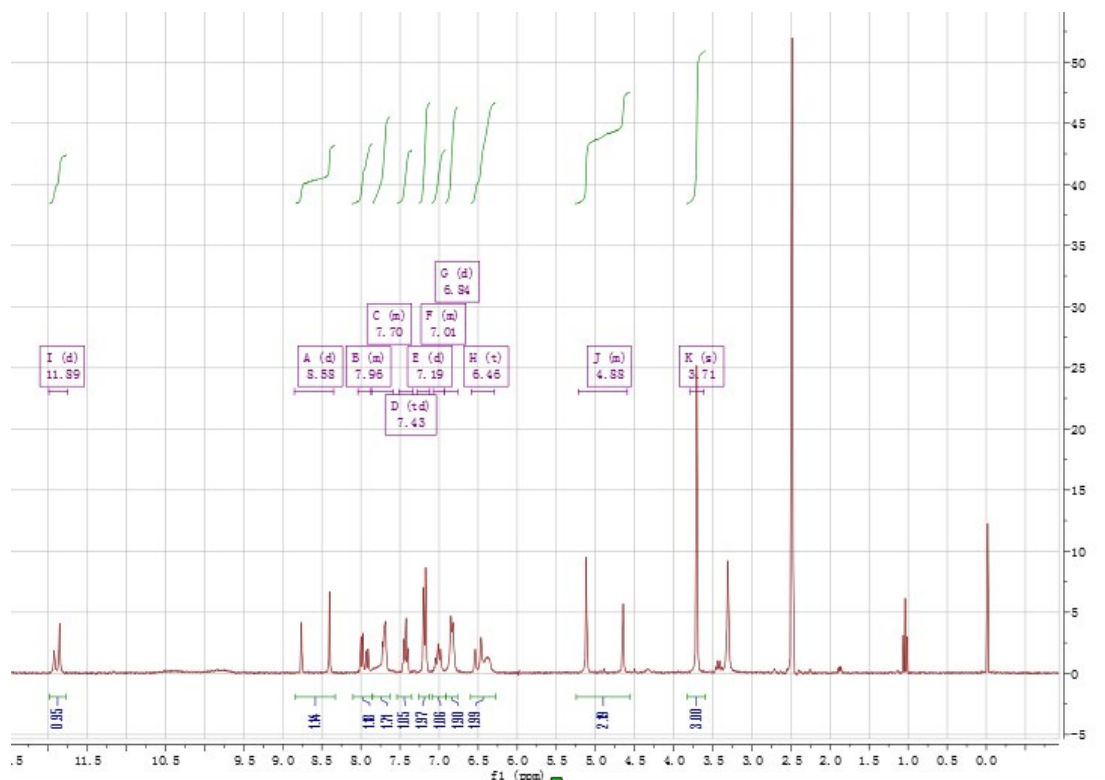

<sup>1</sup>H NMR spectrum of **4i**

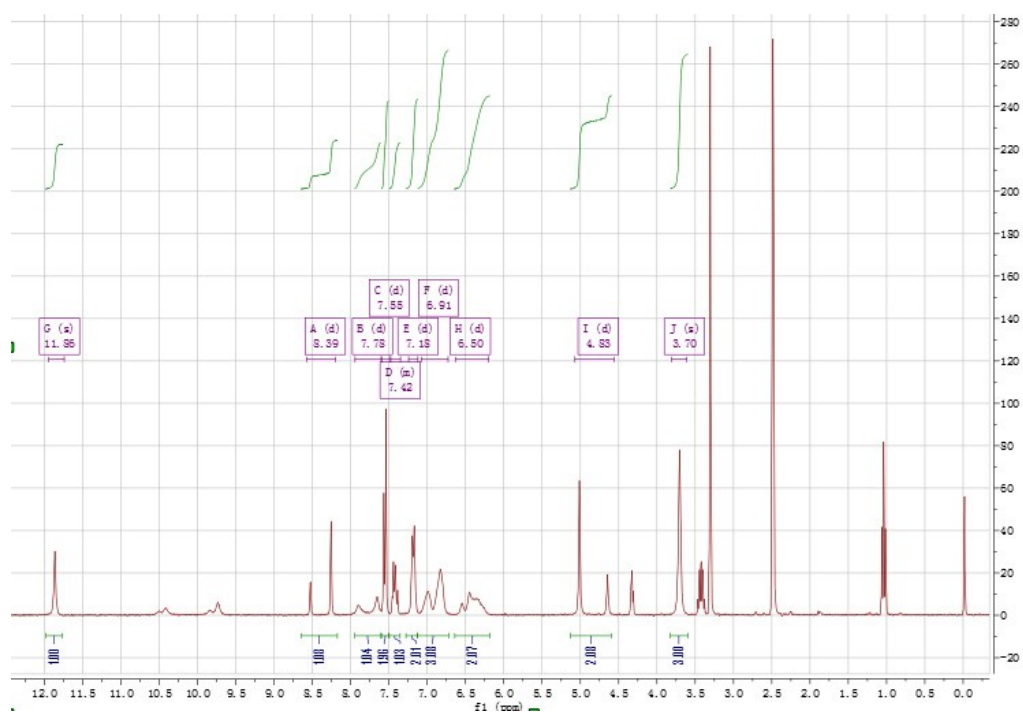

<sup>1</sup>H NMR spectrum of **4j**



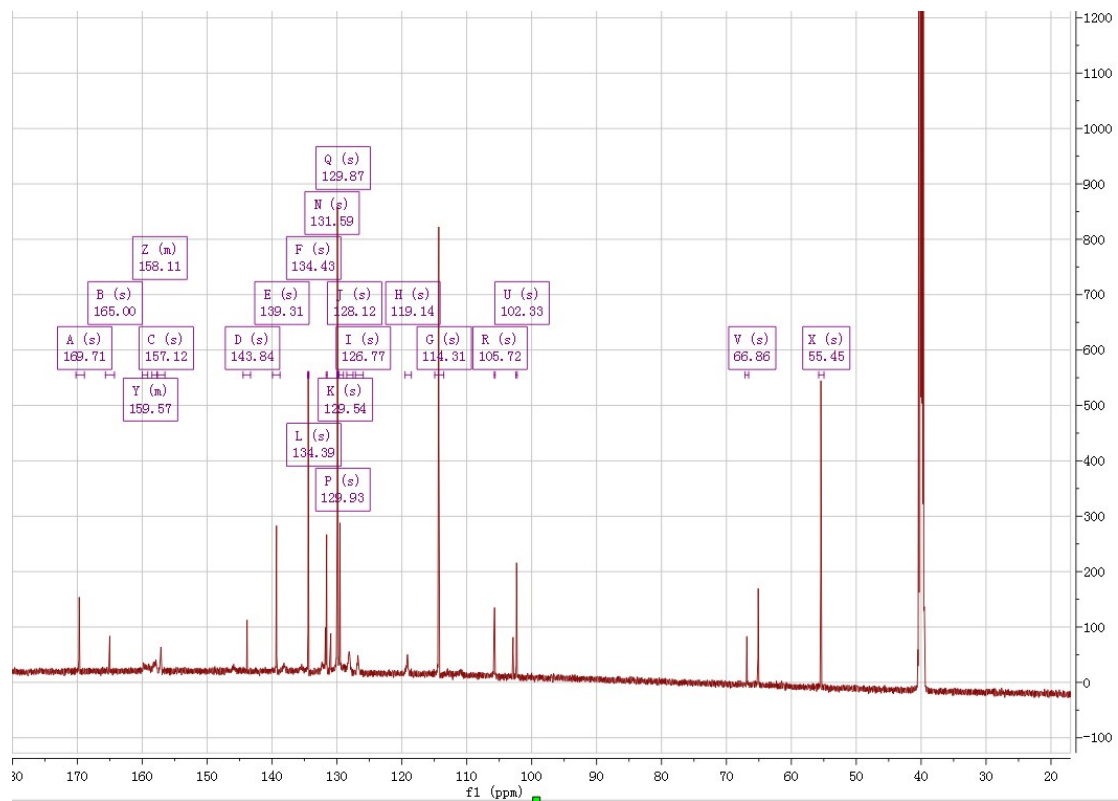

<sup>13</sup>C NMR spectrum of 4j

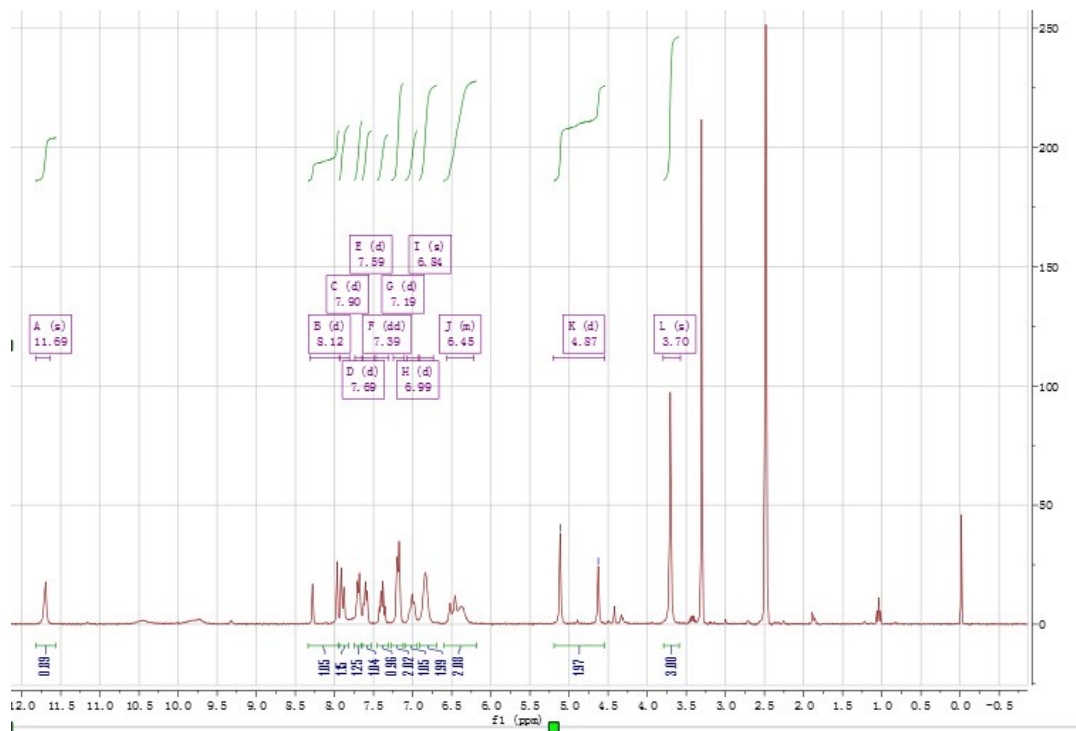

<sup>1</sup>H NMR spectrum of 4k

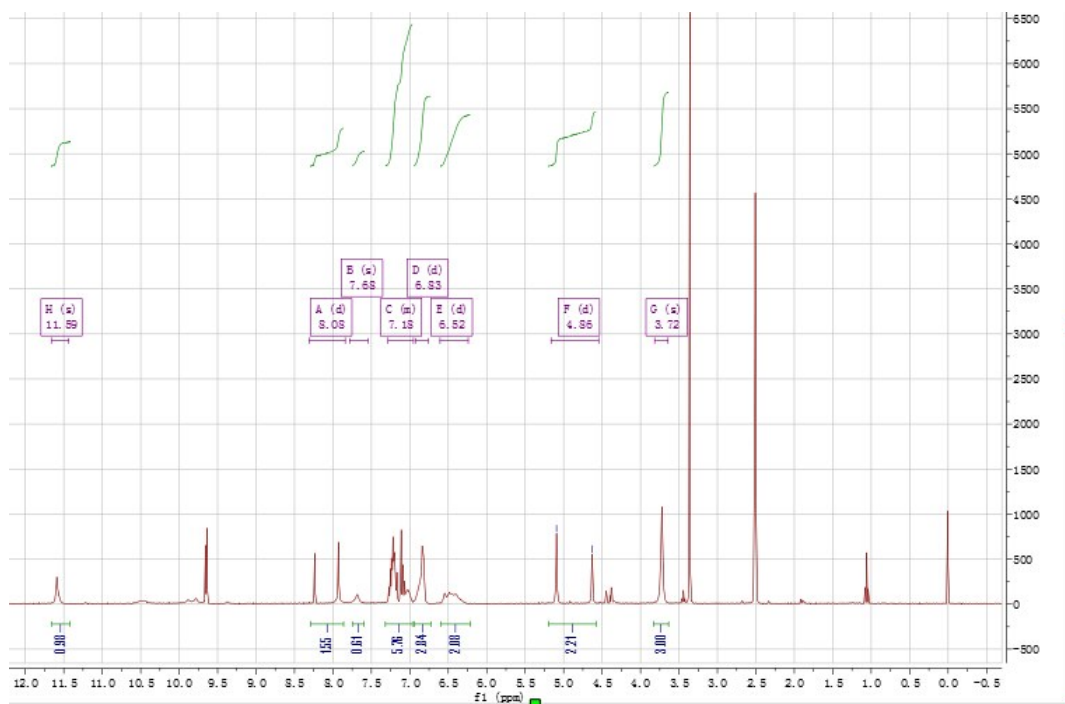

<sup>1</sup>H NMR spectrum of **4I**

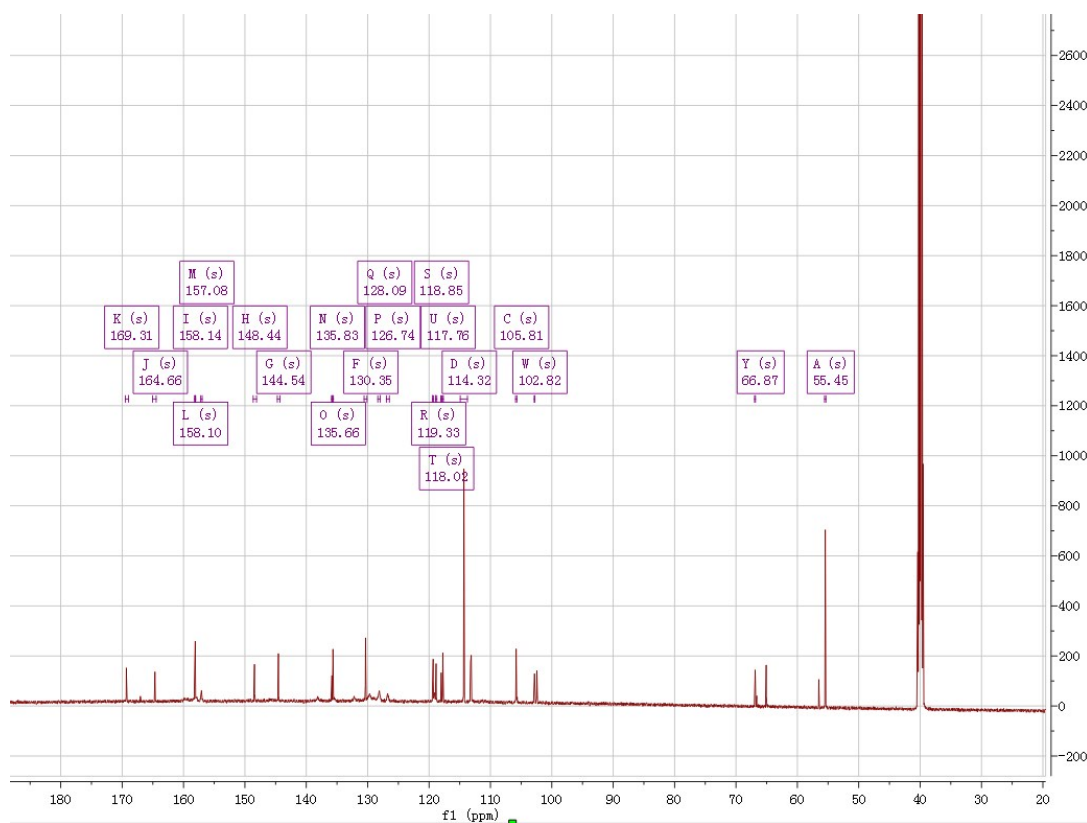

<sup>13</sup>C NMR spectrum of **4I**

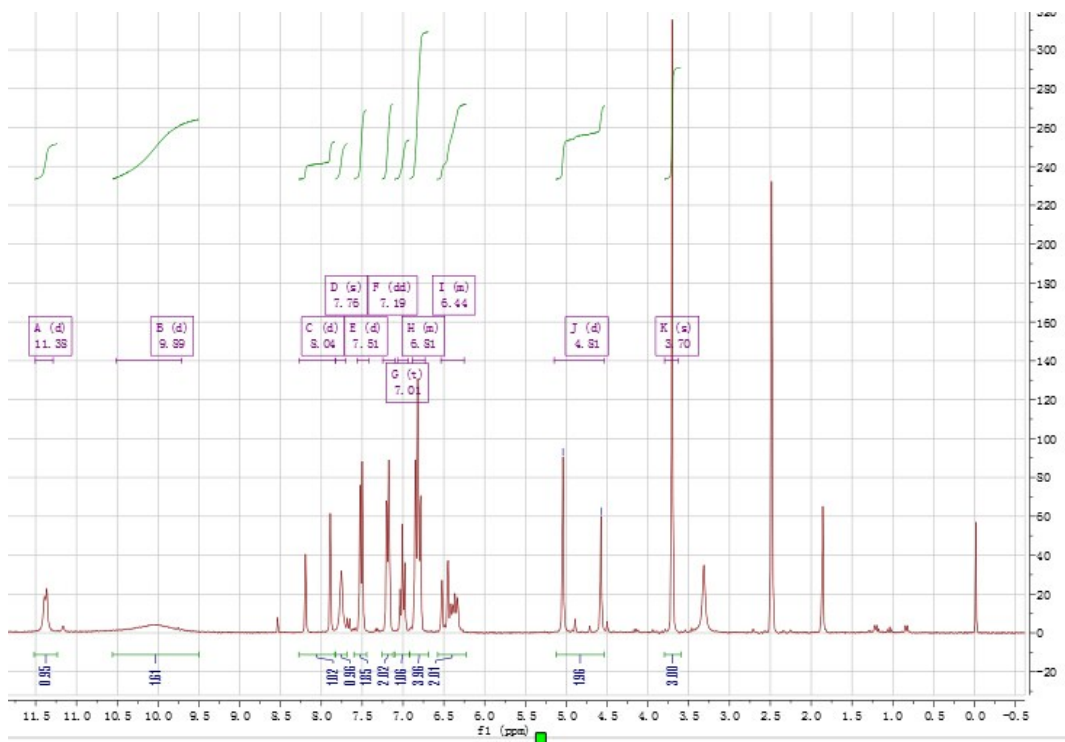

$^1\text{H}$  NMR spectrum of **4m**

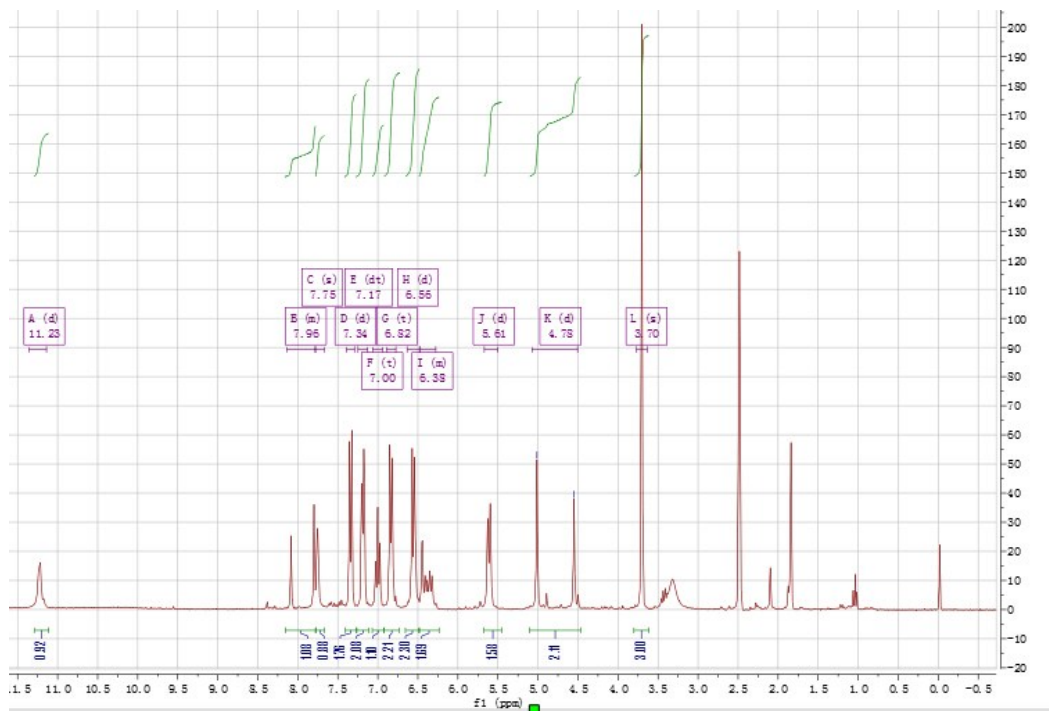

$^1\text{H}$  NMR spectrum of **4n**

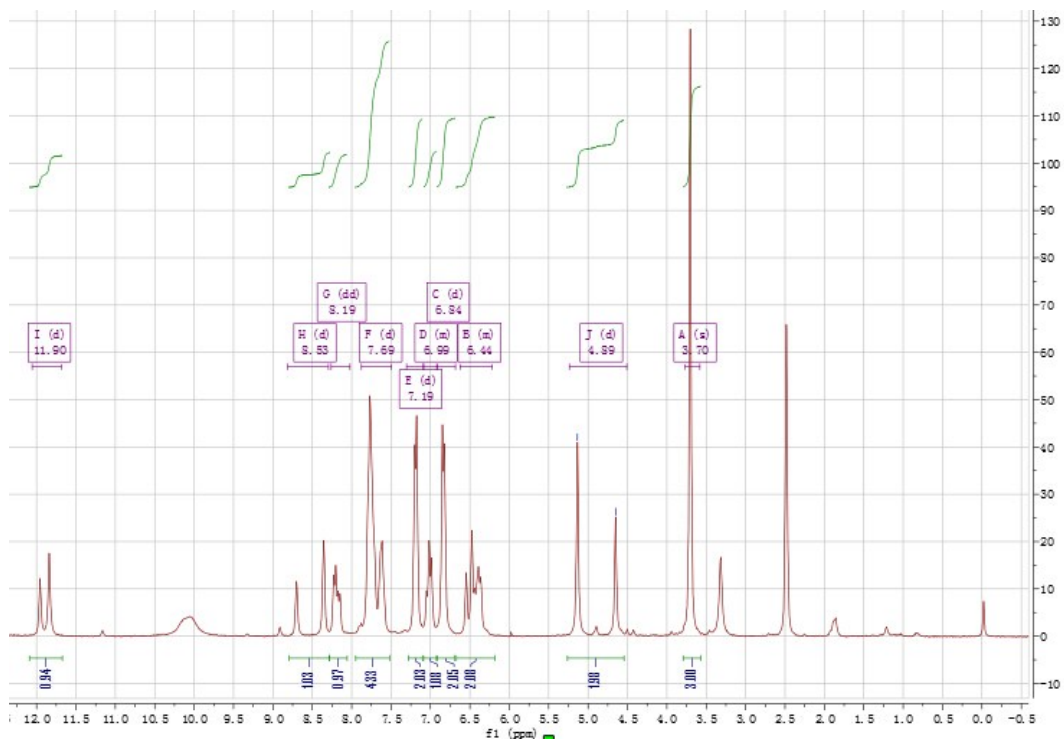

<sup>1</sup>H NMR spectrum of **4o**

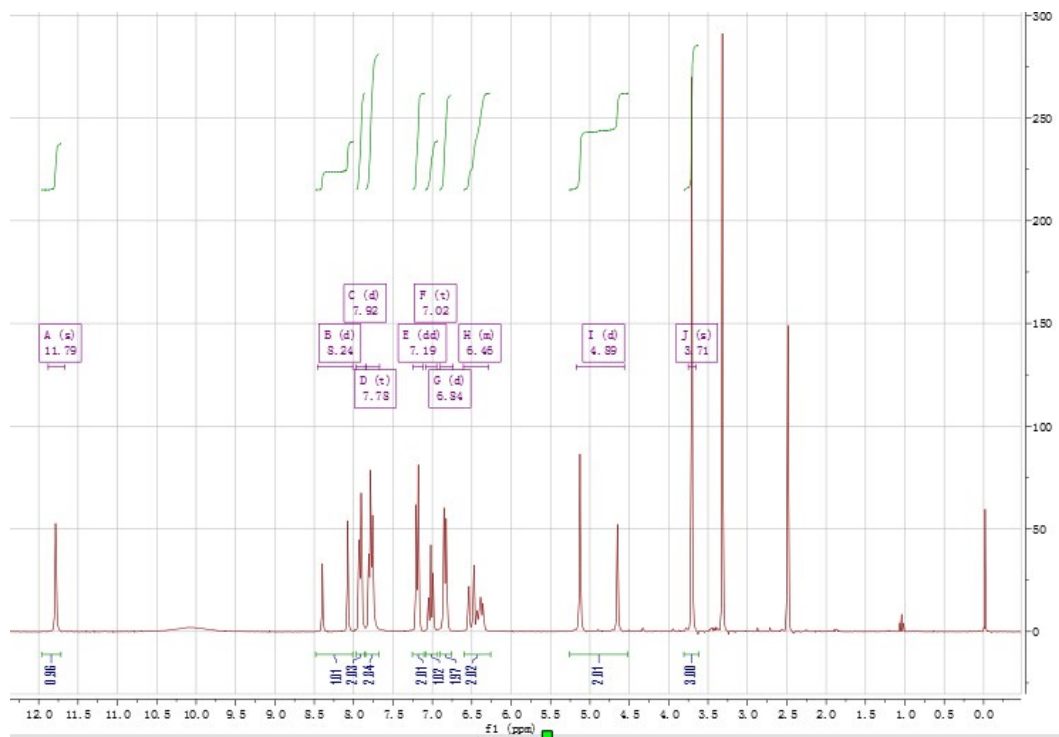

<sup>1</sup>H NMR spectrum of **4p**



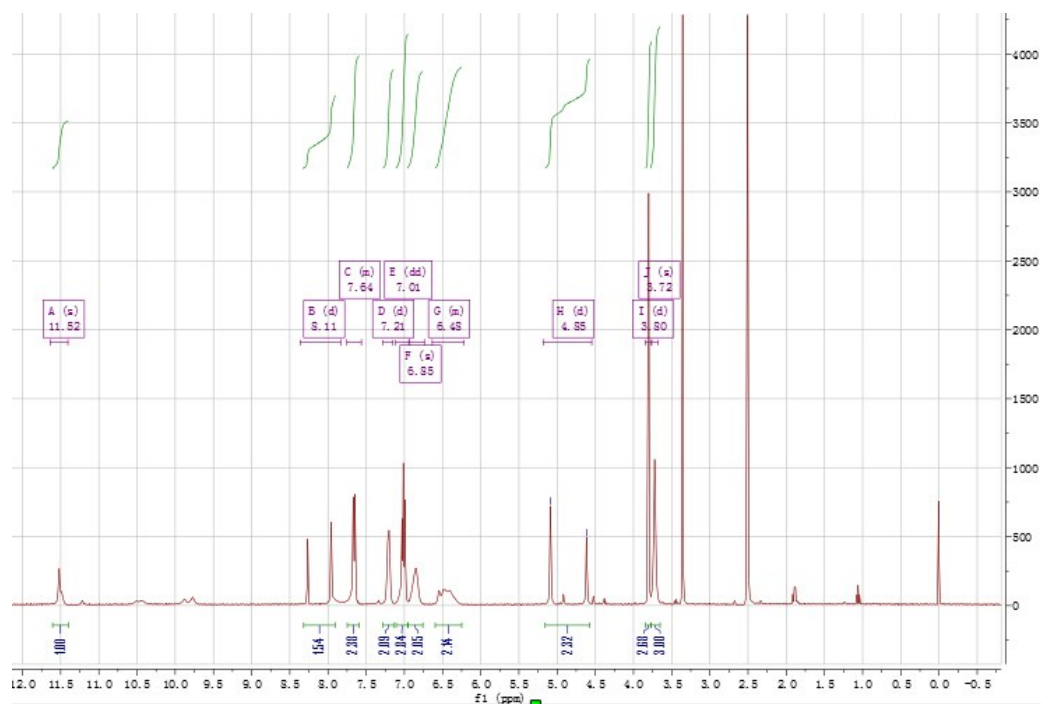

<sup>1</sup>H NMR spectrum of 4s

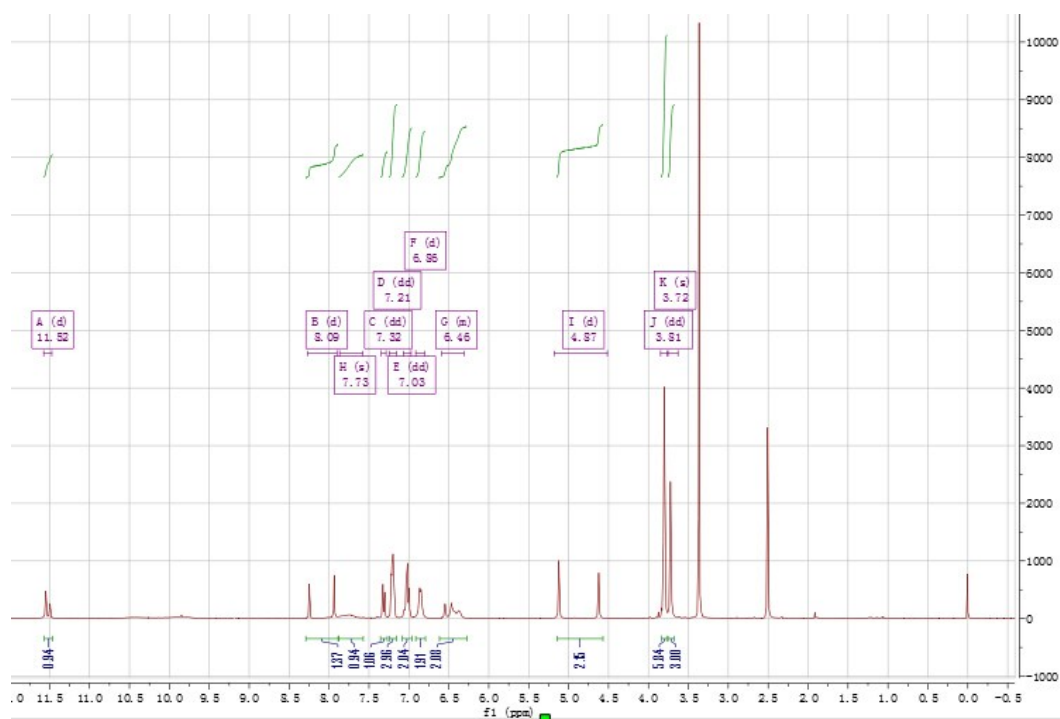

<sup>1</sup>H NMR spectrum of 4t



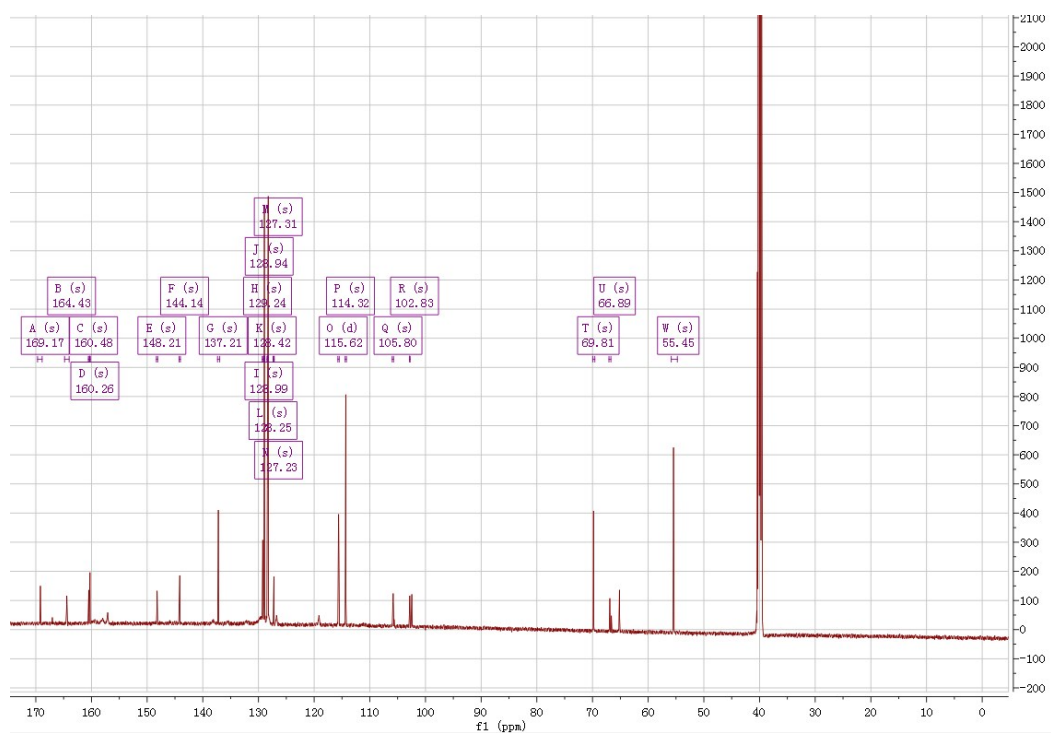

$^{13}\text{C}$  NMR spectrum of **4v**

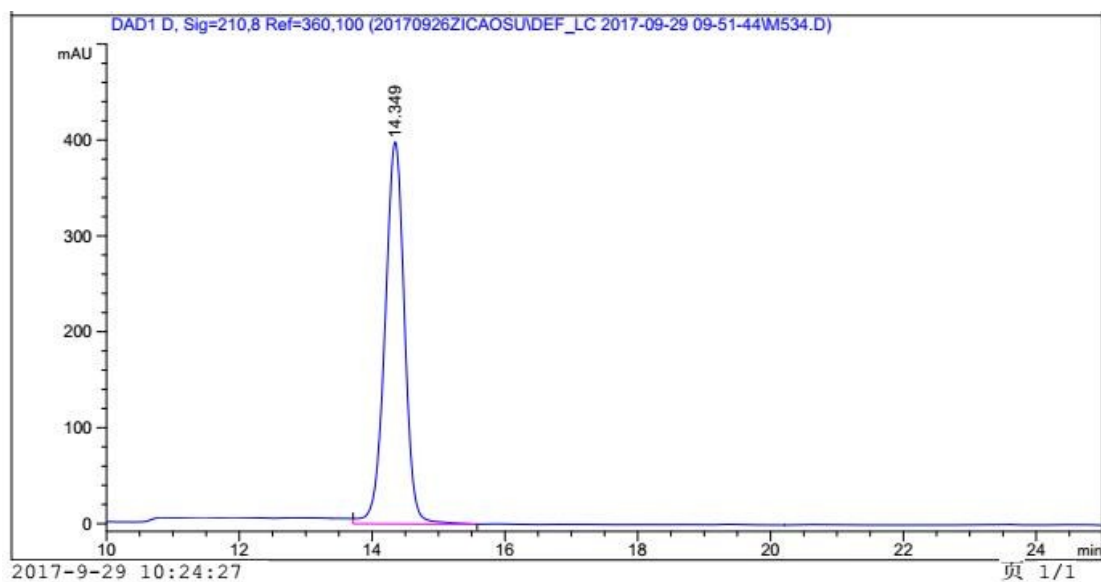

HPLC spectrum of **4v**

Flow rate: 1mL/min, Mobile phase: 50% ACN and 50% 0.1%TFA,  $R_t=14.349\text{min}$ ,  
 Column temperature: 30°C, Column model: Thermo Hypersil Gold 250mm × 4.6mm ×  
 5μm
